# Supplementary material
Source: Springer Nature journal article supplement (https://www.springermedizin.de/resource/supplementary/13075_2010_3432_MOESM5_ESM.pdf/9694220)

### A. CD64<sup>+</sup>CD14<sup>+</sup> Monocytes

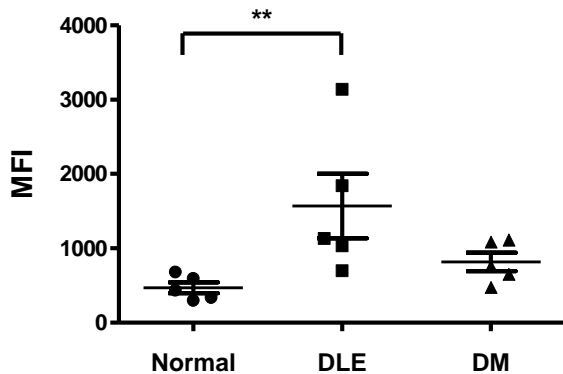

### B. CD11c<sup>+</sup>HLA-DR<sup>hi/low</sup> mDCs

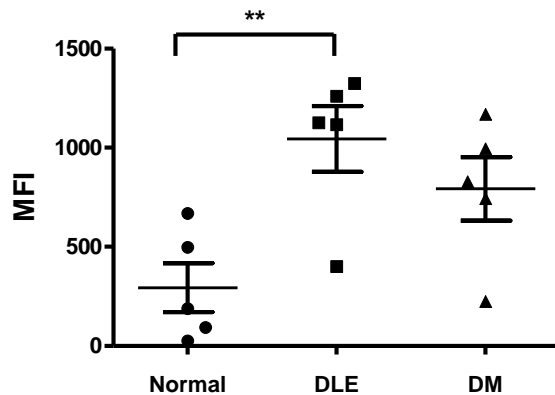

### C. CD123<sup>+</sup> pDCs

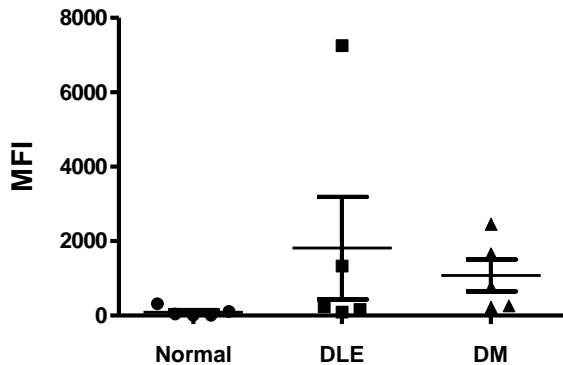

### D. CD3<sup>+</sup> T Cells

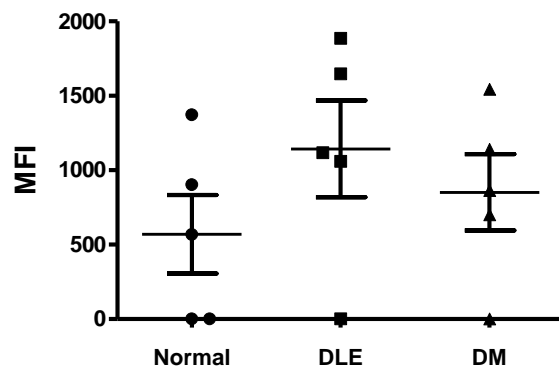

Supplement: MOESM5 [file 9694220]
